# Supplementary material for: Health Effects of Infant Formula Supplemented with Probiotics or Synbiotics in Infants and Toddlers: Systematic Review with Network Meta-Analysis
Source: MDPI journal article supplement (doi:10.3390/nu14235175), 2022-12-05

## **Supplemental Information**

- 1) Supplemental Table S1**
- 2) Supplemental Table S2**
- 3) Supplemental Table S3**
- 4) Supplemental Figure S1**
- 5) Supplemental Figure S2**
- 6) Supplemental Figure S3**
- 7) Supplemental Figure S4**
- 8) Supplemental Figure S5**
- 9) Supplemental Figure S6**

**Supplemental Table S1.** Type of Probiotics included on the analysis

---

**Bifidobacteria**

*B. lactis* Bb12 ( $10^8$  cfu/g)  
*B. lactis* Bb12  $1 \times 10^7$  cfu/  
*B. lactis* Bb12 ( $3 \times 10^7$  cfu/g)  
*B. lactis* Bb12 ( $6 \times 10^9$  cfu/100 ml) + GOS/FOS (6 g/l; 90%/10%)  
*B. lactis* Bb12  $3.85 \times 10^8$  cfu + DHA and AA  
*B. lactis* Bb12 + *S. thermophilus* ( $3 \times 10^7$  cfu/g)  
*B. lactis* Bb12 + *S. thermophilus* ( $1 \times 10^7$  cfu/g)  
*B. lactis* Bb12 + *S. thermophilus*  $1 \times 10^6$  cfu/g  
*B. lactis* Bb12 + *S. thermophilus* (dose not reported)  
*B. lactis* strain CNCM-I-3446,  $1 \times 10^7$  cfu/g + BMOS (GOS + 3'- and 6'-sialyllactose, 8 g/L)  
*B. breve* CECT7263 ( $10^7$  cfu/g)  
*B. breve* M16-V ( $1.8 \times 10^7$  CFU/g) + GOS/FOS (9.5 g/l; 90%/10%)  
*B. longum* BL999  $2 \times 10^7$  cfu/g  
*B. longum* BB536  $1 \times 10^7$  cfu/g) + *Lactobacillus* GG  $2 \times 10^7$  cfu  
*B. longum* BL999 ( $1.29 \times 10^8$  cfu/100 ml) + LPR ( $6.45 \times 10^8$  cfu/100 ml)  
*B. longum* BL999 ( $1.29 \times 10^8$  cfu/100 ml) + LPR ( $6.45 \times 10^8$  cfu/100 ml) + GOS/FOS (0.4 g/100 ml; 90%/10%)  
*B. longum* BL999 ( $2.58 \times 10^8$  cfu/100 ml) + ST11 ( $2.58 \times 10^8$  cfu/100 ml) + GOS/FOS (0.4 g/100 ml; 90%/10%)  
*B. longum* BB536  $1 \times 10^7$  cfu/g  
*B. infantis* IM1 ( $10^7$  cfu/g)  
*B. infantis* R0033 ( $1.425 \times 10^8$  cfu) and *B. bifidum* R0071 ( $1.425 \times 10^8$  cfu), with  $9.6 \times 10^9$  cfu of *L. helveticus* R0052  
*Bifidobacterium bifidum* BF3, *Bifidobacterium breve* BR3, *Bifidobacterium longum* subspecies *infantis* BT1, and *B. longum* BG7. ( $1 \times 10^7$  CFU/g)

---

**Lactobacillus**

*L. reuteri* DSM 17938  $1 \times 10^7$  cfu/g  
*L. reuteri* DSM 17938  $1.2 \times 10^6$  cfu/ml  
*L. reuteri*  $1.2 \times 10^9$  cfu/l  
*Lactobacillus* GG  $10^7$  cfu/g  
*L. johnsonii* La1  $10^8$  cfu/g + FOS  
*L. salivarius* CECT5713  $2 \times 10^6$  cfu/g  
*L. rhamnosus* GG  $1 \times 10^7$  CFU/g + Inulin and fructan from agave (0.5g/100ml)  
*L. fermentum* CECT5716 Lc40 ( $10^7$  cfu/g)

---

**Supplemental Table S2.** Risk of bias evaluation for included RCTs

| Reference                               | Adequate sequence generation? | Allocation concealment? | Blinding? | Incomplete outcome data addressed? | Free of selective reporting? | Free of other bias? |
|-----------------------------------------|-------------------------------|-------------------------|-----------|------------------------------------|------------------------------|---------------------|
| 1999, Phaupradit <sup>28</sup>          | unclear                       | unclear                 | unclear   | unclear                            | unclear                      | unclear             |
| 2002, Nopchinda <sup>29</sup>           | unclear                       | unclear                 | yes       | no                                 | unclear                      | unclear             |
| 2004, Saavedra <sup>30</sup>            | yes                           | unclear                 | yes       | yes                                | unclear                      | unclear             |
| 2005, Weizman <sup>31</sup>             | yes                           | unclear                 | yes       | yes                                | unclear                      | unclear             |
| 2005, Bakker-Zierikzee <sup>32</sup>    | unclear                       | unclear                 | yes       | no                                 | unclear                      | unclear             |
| 2006, Weizman <sup>33</sup>             | yes                           | unclear                 | yes       | yes                                | unclear                      | unclear             |
| 2006, Brunser <sup>34</sup>             | yes                           | yes                     | yes       | yes                                | unclear                      | unclear             |
| 2006, Vendt <sup>35</sup>               | yes                           | unclear                 | yes       | yes                                | unclear                      | unclear             |
| 2007, Mah <sup>36</sup>                 | unclear                       | unclear                 | yes       | unclear                            | unclear                      | unclear             |
| 2008, Chouraqui <sup>37</sup>           | unclear                       | unclear                 | yes       | yes                                | unclear                      | unclear             |
| 2008, Haschke-Becher <sup>38</sup>      | unclear                       | unclear                 | yes       | unclear                            | unclear                      | unclear             |
| 2009, Gibson <sup>39</sup>              | yes                           | yes                     | yes       | yes                                | unclear                      | unclear             |
| 2010, Maldonado <sup>40</sup>           | unclear                       | unclear                 | yes       | yes                                | unclear                      | unclear             |
| 2011, Hascoet <sup>41</sup>             | unclear                       | unclear                 | unclear   | no                                 | unclear                      | unclear             |
| 2013 Gutiérrez-Castrellón <sup>42</sup> | yes                           | yes                     | yes       | yes                                | yes                          | unclear             |
| 2014, Papagaroufalis <sup>43</sup>      | yes                           | yes                     | yes       | no                                 | yes                          | unclear             |
| 2015 Gutiérrez-Castrellón <sup>44</sup> | yes                           | yes                     | yes       | yes                                | yes                          | unclear             |
| 2016, Garcia Rodenas <sup>6</sup>       | yes                           | yes                     | yes       | yes                                | unclear                      | unclear             |
| 2016, Wu <sup>7</sup>                   | yes                           | yes                     | yes       | no                                 | unclear                      | unclear             |
| 2016, Cooper <sup>45</sup>              | yes                           | yes                     | yes       | yes                                | unclear                      | unclear             |
| 2016, Baglatzi <sup>3</sup>             | yes                           | yes                     | yes       | yes                                | yes                          | unclear             |
| 2017, Radke <sup>12</sup>               | yes                           | yes                     | yes       | yes                                | unclear                      | unclear             |
| 2018, Escribano <sup>15</sup>           | yes                           | yes                     | yes       | yes                                | yes                          | unclear             |
| 2018, Kosuwon <sup>46</sup>             | yes                           | yes                     | yes       | yes                                | unclear                      | unclear             |
| 2019, Xiao <sup>16</sup>                | yes                           | yes                     | yes       | yes                                | unclear                      | unclear             |
| 2019, Maldonado <sup>17</sup>           | yes                           | yes                     | yes       | yes                                | unclear                      | unclear             |

**Supplemental Table S3.** Excluded randomized controlled trials

| Reference                   | Reasons for exclusion                                                                                                                                                                                       |
|-----------------------------|-------------------------------------------------------------------------------------------------------------------------------------------------------------------------------------------------------------|
| Langhendries, 1995          | Intervention: fermented formula                                                                                                                                                                             |
| Kirjavainen, 2003           | Population: infants with atopic dermatitis                                                                                                                                                                  |
| Ziegler, 2003               | Intervention: partially hydrolysed formula                                                                                                                                                                  |
| Chouraqui, 2004             | Intervention: fermented formula                                                                                                                                                                             |
| Correa, 2005                | Population: inpatients children receiving antibiotics (6-26 mo)                                                                                                                                             |
| Brouwer, 2006               | Population: infants with atopic dermatitis<br>Intervention: extensively hydrolysed whey formula with LGG                                                                                                    |
| Rautava, 2006& 2009         | Probiotics were not introduced during the manufacturing process, but thereafter, in capsules, the contents of which were supplemented to infant formula                                                     |
| Puccio, 2007                | Intervention: formula with synbiotic                                                                                                                                                                        |
| Hol, 2008                   | Population: infants with cow's milk allergy<br>Intervention: extensively hydrolysed formula with a combination of 2 probiotics ( <i>Lactobacillus casei</i> CRL431 and <i>Bifidobacterium lactis</i> Bb-12) |
| Urban, 2008                 | Intervention: fermented formula                                                                                                                                                                             |
| Velaphi, 2008               | Intervention: fermented formula                                                                                                                                                                             |
| West, 2008                  | Intervention: probiotic-supplemented cereal                                                                                                                                                                 |
| Vlieger, 2009               | Intervention: synbiotic formula vs prebiotic formula                                                                                                                                                        |
| Soh, 2009                   | Population: Children at risk (Family history) of allergic disorders                                                                                                                                         |
| Scalabrin, 2009             | Intervention: casein hydrolysate with LGG                                                                                                                                                                   |
| Baldassare, 2010            | Population: Infants with haematochezia (presumptive diagnosis of cow's milk allergic colitis)<br>Intervention: extensively hydrolysed casein formula with LGG                                               |
| Cox, 2010                   | daily supplement of <i>Lactobacillus casei</i> subsp. <i>rhamnosus</i> (LGG)                                                                                                                                |
| Maldonado, 2010, 2012, 2015 | Intervention: synbiotic formula vs formula with prebiotic                                                                                                                                                   |
| Dupont, 2010                | Intervention: synbiotic formula vs normal formula                                                                                                                                                           |
| Gil-Campos, 2011            | Intervention: synbiotic formula vs formula with prebiotic                                                                                                                                                   |
| Holscher, 2012              | Intervention: partially hydrolysed whey formula                                                                                                                                                             |
| Muraro, 2012                | Infants with cow's milk allergy                                                                                                                                                                             |
| Marzotto, 2012              | Intervention: yoghurt and fermented milk                                                                                                                                                                    |
| Vandenplas, 2013            | Infants with cow's milk allergy                                                                                                                                                                             |
| Sarvetnick, 2013            | Abstract from conference, outcome: changes in immune cell populations and activation markers                                                                                                                |
| Berni-Canani, 2013          | Non-randomised study                                                                                                                                                                                        |
| Bocquet, 2013               | Intervention: formula with symbiotic versus formula with probiotic                                                                                                                                          |
| Cohen, 2013                 | Intervention: synbiotic formula vs normal formula                                                                                                                                                           |
| Oswari, 2013                | Intervention: formula with synbiotic                                                                                                                                                                        |
| Cecola, 2015                | Intervention: formula with probiotic versus formula with prebiotic                                                                                                                                          |
| Baglatzi, 2015              | Intervention: formula with low dose of <i>Bifidobacterium lactis</i> CNCM I-3446 versus formula with regular dose of <i>B lactis</i> .                                                                      |
| Lee, 2015                   | Intervention: formula with probiotic vs formula with synbiotic                                                                                                                                              |
| Fatheree, 2016              | Population: infants with colic<br>Intervention: casein hydrolysate with LGG                                                                                                                                 |
| Bazanella, 2016             | Abstract from conference, outcome: structure and function of faecal microbiota                                                                                                                              |
| Fields, 2016                | Intervention: extensively hydrolysed whey formula with <i>Bifidobacterium lactis</i>                                                                                                                        |
| Canani, 2016                | Population: Infants with cow's milk allergy                                                                                                                                                                 |
| Lingfen Xu, 2016            | Population: Preterm infants                                                                                                                                                                                 |
| Canani, 2016                | Population: Infants with cow's milk allergy                                                                                                                                                                 |
| Scalabrin, 2017             | Intervention: extensively hydrolysed formula                                                                                                                                                                |
| Indrio, 2017                | Population: infants with functional regurgitation<br>Intervention: Partially hydrolysate whey infant formula                                                                                                |
| Soo Park, 2017              | Population: children with rotavirus infection                                                                                                                                                               |

|                  |                                                                                 |
|------------------|---------------------------------------------------------------------------------|
| Bazanella, 2017  | Intervention: Comparison high dose vs low dose of the same probiotic            |
| Vandenplas, 2017 | Design: Open label, single arm                                                  |
| Guest, 2018      | Population: Infants with cow's milk allergy                                     |
| Korpela, 2018    | Population: Intervention to mother during pregnancy and children                |
| Candy, 2018      | Population: Infants with cow's milk allergy                                     |
| Wopereis, 2019   | Population: Infants with cow's milk allergy                                     |
| Cheng chi, 2019  | Population: Low birth weight infants                                            |
| Xiaonan Li, 2019 | Intervention: Comparison with milk fat globule membrane enriched infant formula |
| Xuewei Cui, 2019 | Population: Preterm infants                                                     |
| Basturk, 2019    | Population: Infants with cow's milk allergy                                     |

**Supplemental Figure S1.** Network Meta-Analysis for probiotics in infant formula and colic; comparison adjusted funnel plot of multiple treatments.

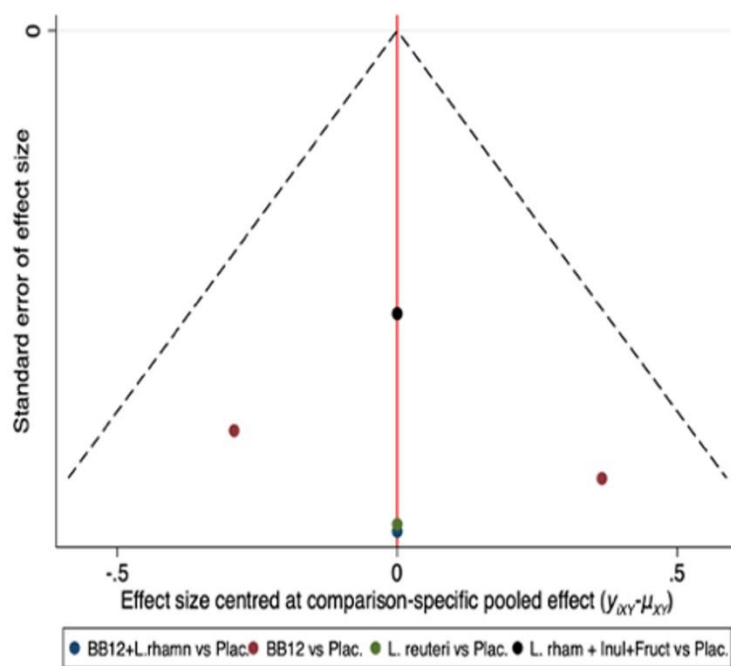

**Supplemental Figure S2.** Network Meta Analysis for probiotics in infant formula and diarrhoea; comparison adjusted funnel plot of multiple treatments.

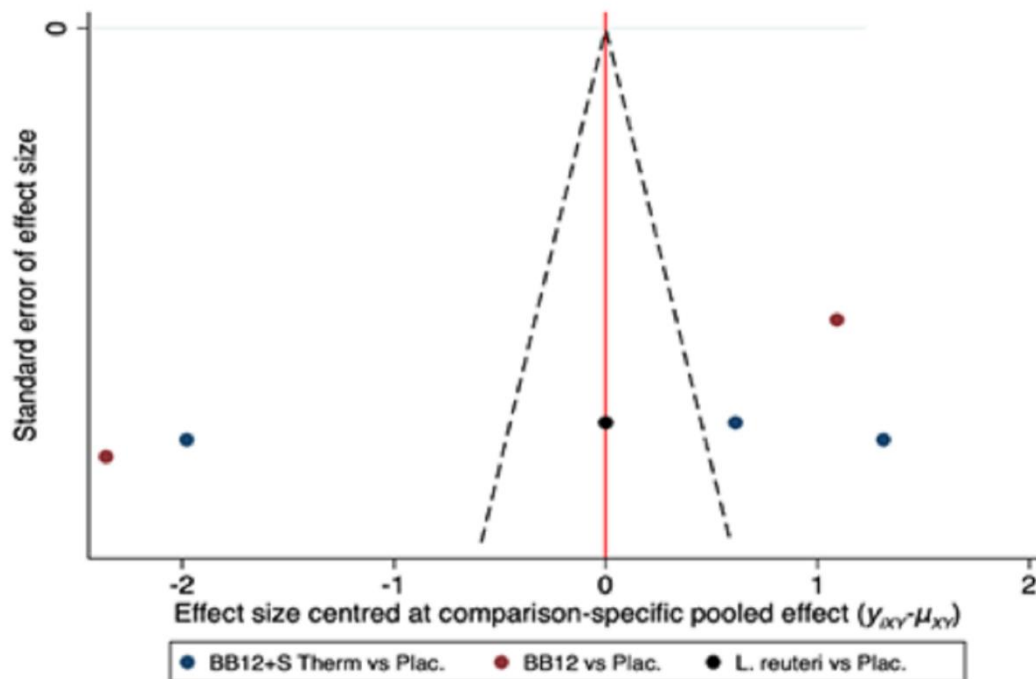

**Supplemental Figure S3.** Network Meta-Analysis for probiotics in infant formula and use of antibiotics; comparison adjusted funnel plot of multiple treatments.

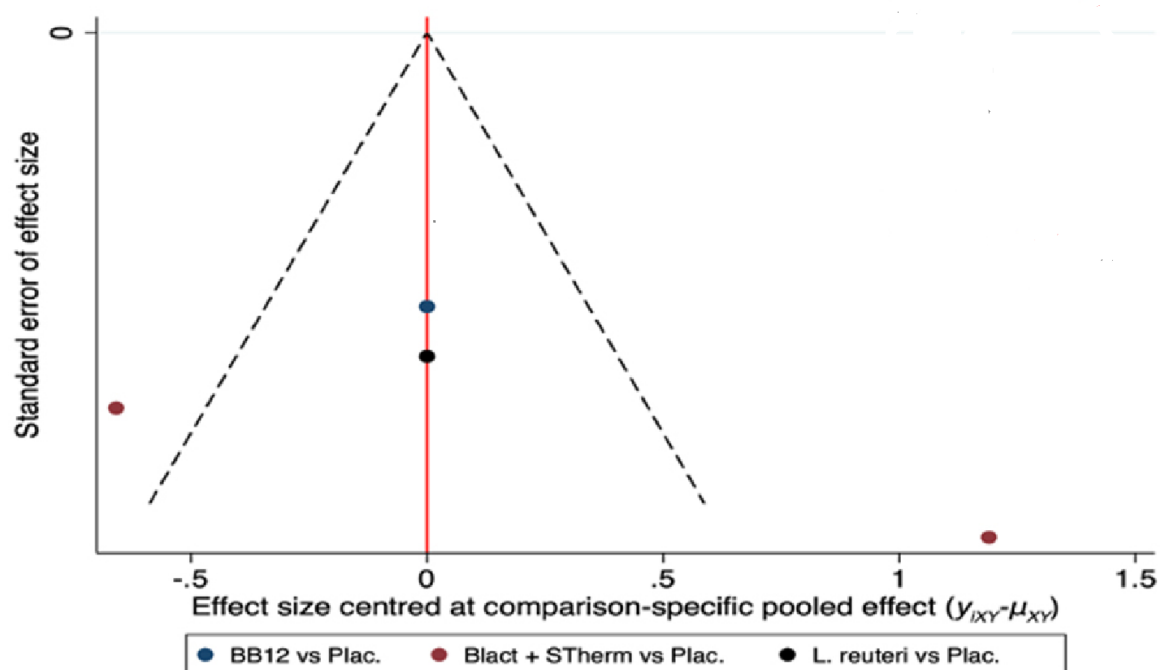

**Supplemental Figure S4.** Network Meta-Analysis for probiotics in infant formula and change on weight/height Z score; comparison adjusted funnel plot of multiple treatments.

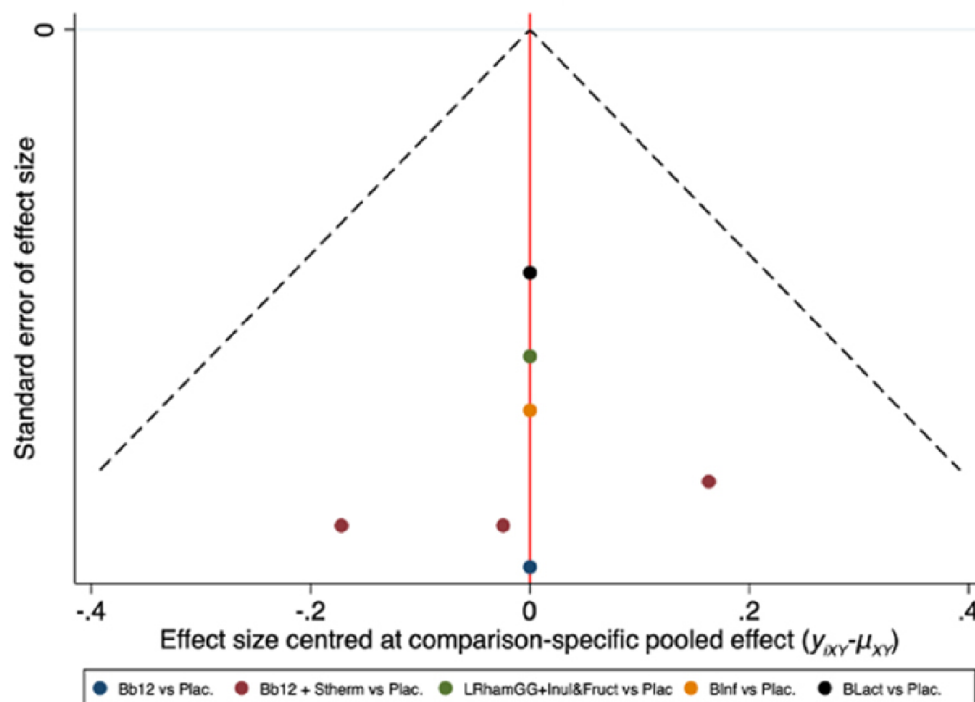

**Supplemental Figure S5.** Network meta-analysis for probiotics and change on fecal Bifidobacteria; comparison adjusted funnel plot of multiple treatments.

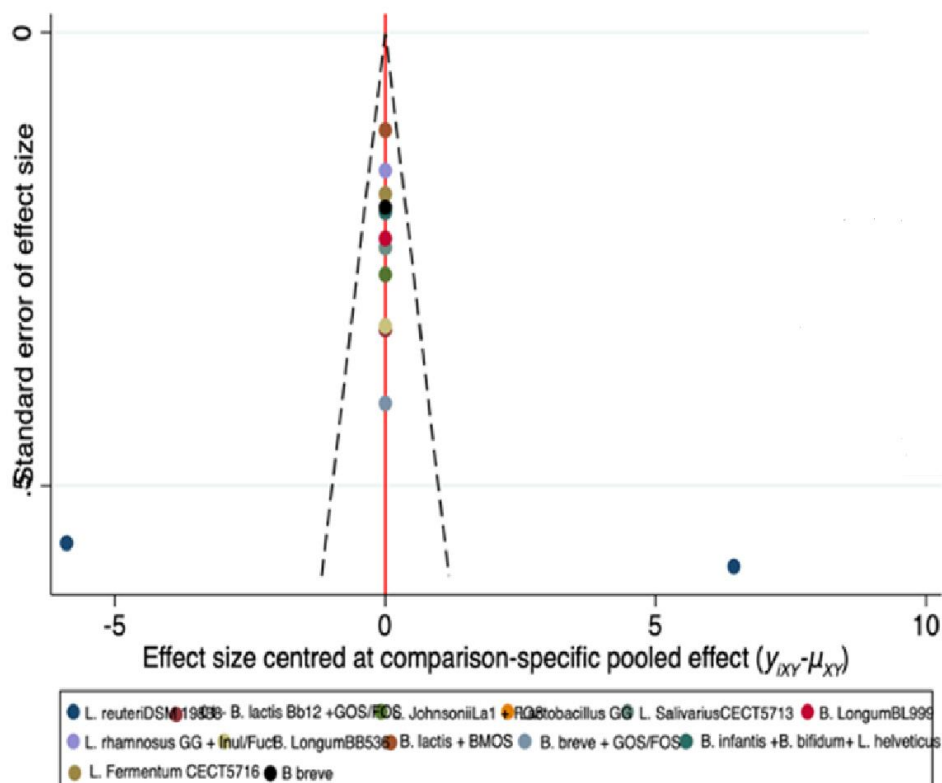

**Supplemental Figure S6.** Network meta-analysis for probiotics and change on fecal *Lactobacilli*; comparison adjusted funnel plot of multiple treatments.

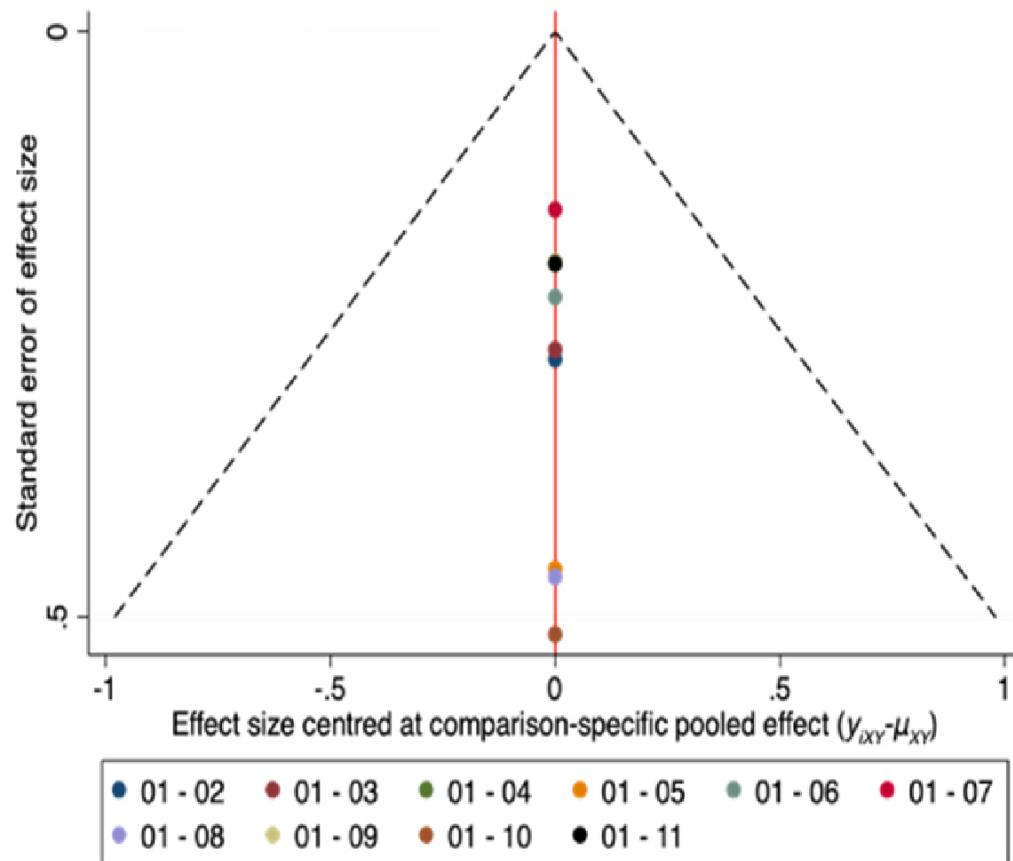

Supplement: s1 [file s1]
